# Supplementary material for: Reversed selectivity of photocatalytic CO2 reduction over metallic Pt and Pt(ii) oxide cocatalysts
Source: Royal Society of Chemistry journal article supplement (doi:10.1039/d1cp00407g), 2021-01-01
Supplement: d1cp00407g1.pdf [file d1cp00407g1.pdf]

## Supporting Information

### Reversed selectivity of photocatalytic CO<sub>2</sub> reduction over metallic Pt and Pt (II) oxide cocatalysts

Junyi Wang, Youzi Li, Jiangting Zhao, Zhuo Xiong\*, Junying Zhang and Yongchun

Zhao\*

State Key Laboratory of Coal Combustion, School of Energy and Power Engineering,

Huazhong University of Science & Technology, Wuhan 430074, China.

Email: zxiong@hust.edu.cn; yczhao@hust.edu.cn,

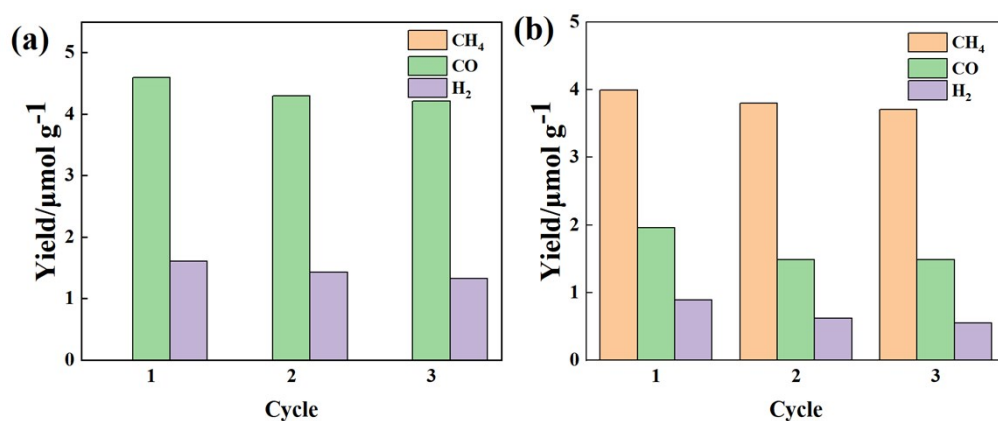

Fig. S1 Stability test on PtO/TiO<sub>2</sub> (a) and Pt/TiO<sub>2</sub> (b) photocatalytic CO<sub>2</sub> reduction.

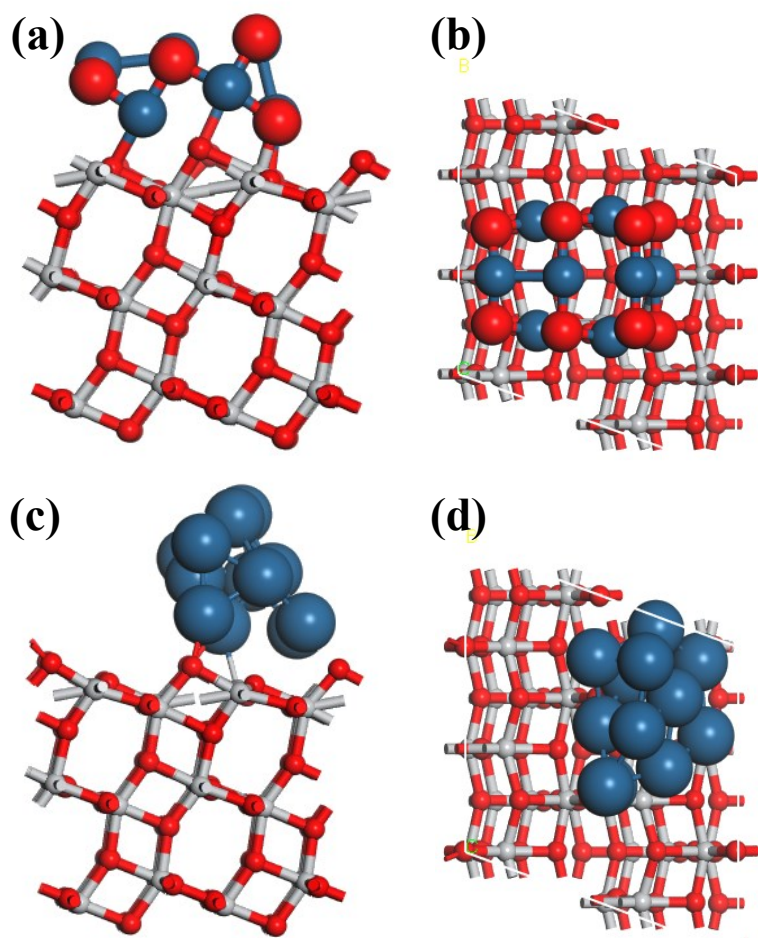

Fig. S2 The optimized geometry of Pt<sub>8</sub>O<sub>8</sub>/TiO<sub>2</sub>(101) on top view (a) and side view (b), and Pt<sub>12</sub>/TiO<sub>2</sub>(101) on top view (c) and side view (d). Red, dark gray, blue and light gray balls represent O, C, Pt and Ti atoms, respectively.

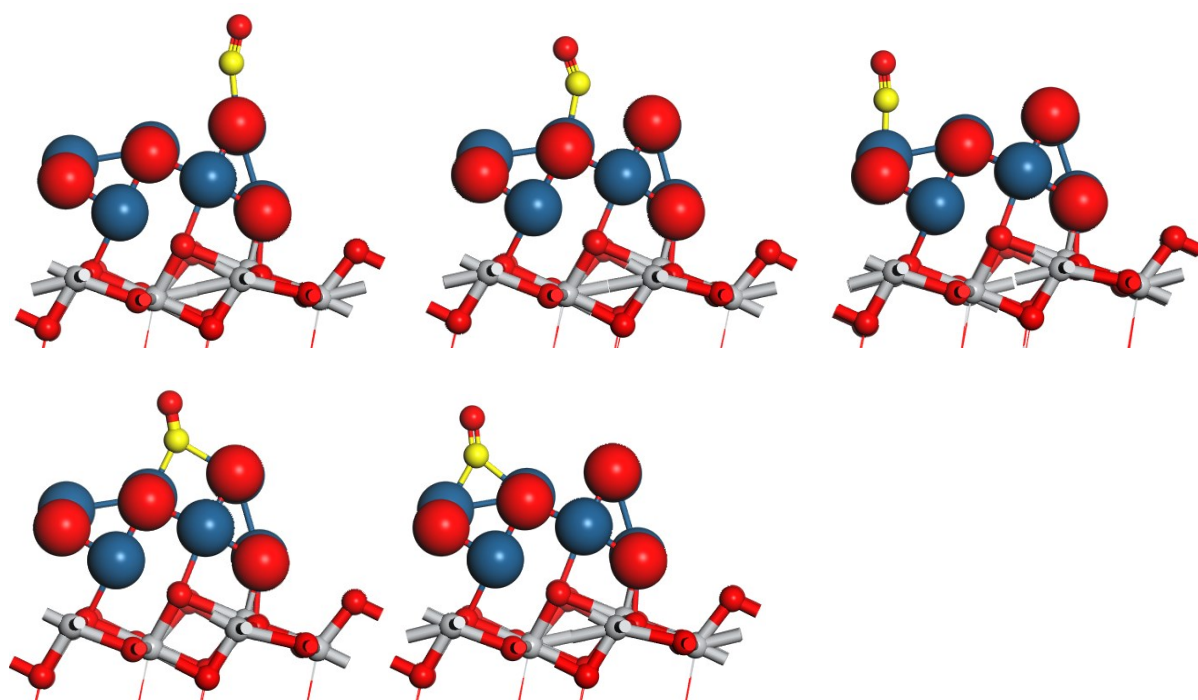

Fig. S3 The CO adsorption sites of Pt<sub>8</sub>O<sub>8</sub>/TiO<sub>2</sub>(101).

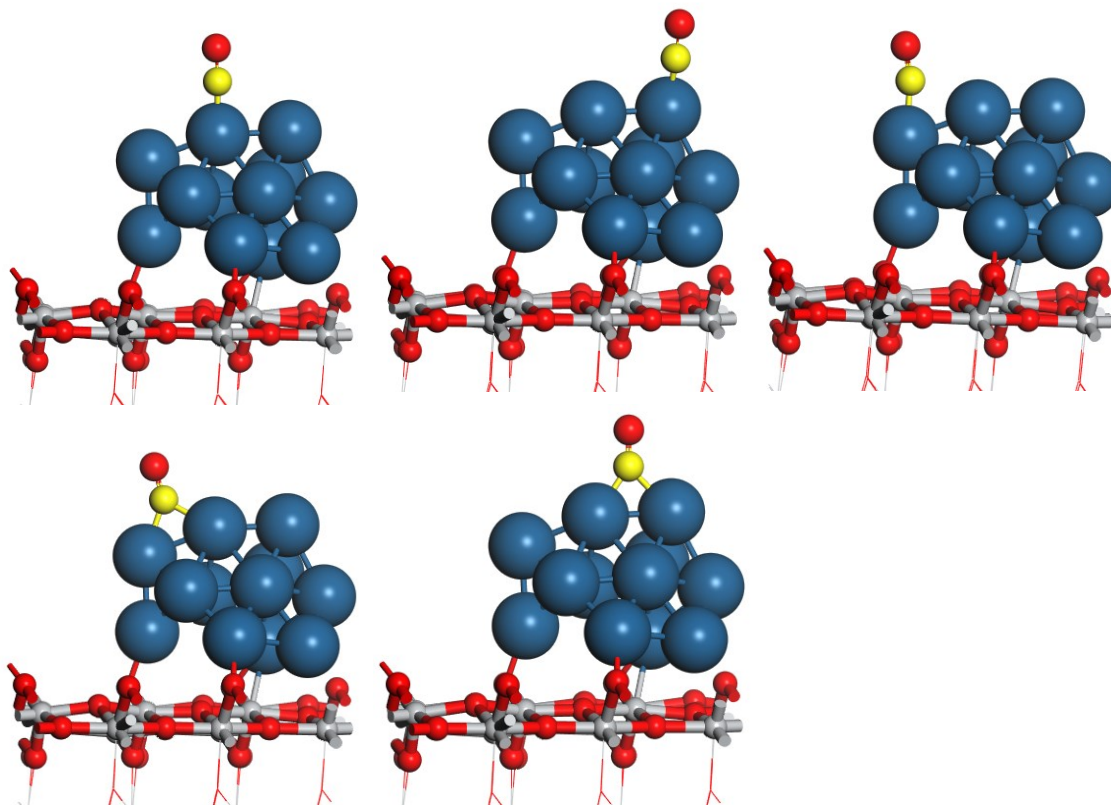

Fig. S4 The CO adsorption sites of Pt<sub>12</sub>/TiO<sub>2</sub>(101).

Table S1 adsorption energies and Mulliken charge CO of Pt<sub>8</sub>O<sub>8</sub>/TiO<sub>2</sub>(101) and Pt<sub>12</sub>/TiO<sub>2</sub>(101) surfaces.

| Surface              | Site    | E <sub>ads</sub> /eV | Mulliken Charge |             |              |              |
|----------------------|---------|----------------------|-----------------|-------------|--------------|--------------|
|                      |         |                      | C               | O           | Total        |              |
| PtO/TiO <sub>2</sub> | Top     | 1                    | -0.79           | 0.31        | -0.31        | 0            |
|                      |         | <b>2</b>             | <b>-0.70</b>    | <b>0.23</b> | <b>-0.31</b> | <b>-0.08</b> |
|                      |         | 3                    | -0.86           | 0.27        | -0.32        | -0.05        |
|                      | Bridge  | 1                    | -0.81           | 0.12        | -0.30        | -0.18        |
|                      |         | <b>2</b>             | <b>-1.25</b>    | <b>0.11</b> | <b>-0.32</b> | <b>-0.21</b> |
|                      |         | 3                    | -2.65           | 0.21        | -0.35        | -0.14        |
| Pt/TiO <sub>2</sub>  | Top     | 2                    | -2.48           | 0.21        | -0.35        | -0.14        |
|                      |         | <b>3</b>             | <b>-2.06</b>    | <b>0.14</b> | <b>-0.33</b> | <b>-0.19</b> |
|                      |         | 1                    | -2.16           | 0.04        | -0.34        | -0.30        |
|                      | Bridge  | <b>2</b>             | <b>-2.63</b>    | <b>0.02</b> | <b>-0.36</b> | <b>-0.34</b> |
|                      |         | 1                    | -2.16           | 0.04        | -0.34        | -0.30        |
|                      | Free CO |                      |                 | 0.42        | -0.42        | 0            |
